# Supplementary material for: Agreement of amyloid PET and CSF biomarkers for Alzheimer's disease on Lumipulse
Source: PubMed Central journal article supplement (PMC6764494; doi:10.1002/acn3.50873), 2019-08-28

**A**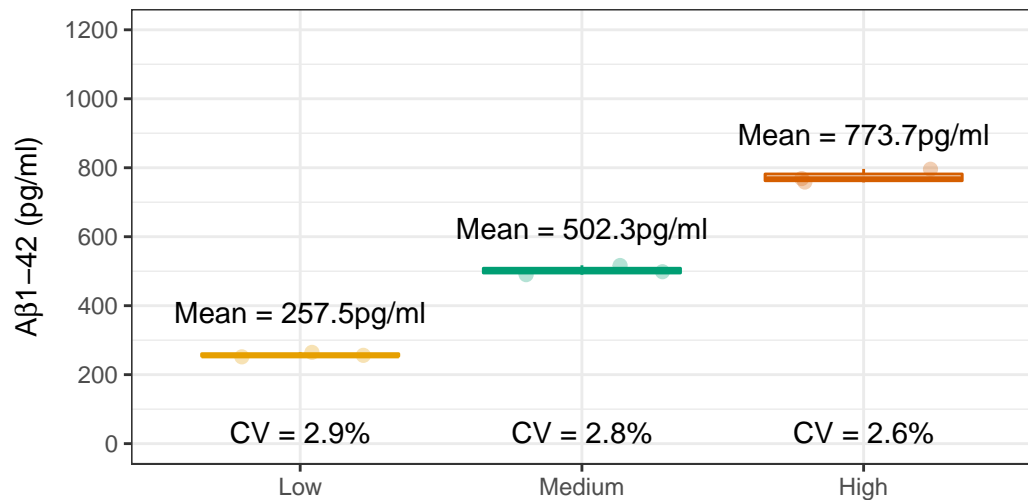**B**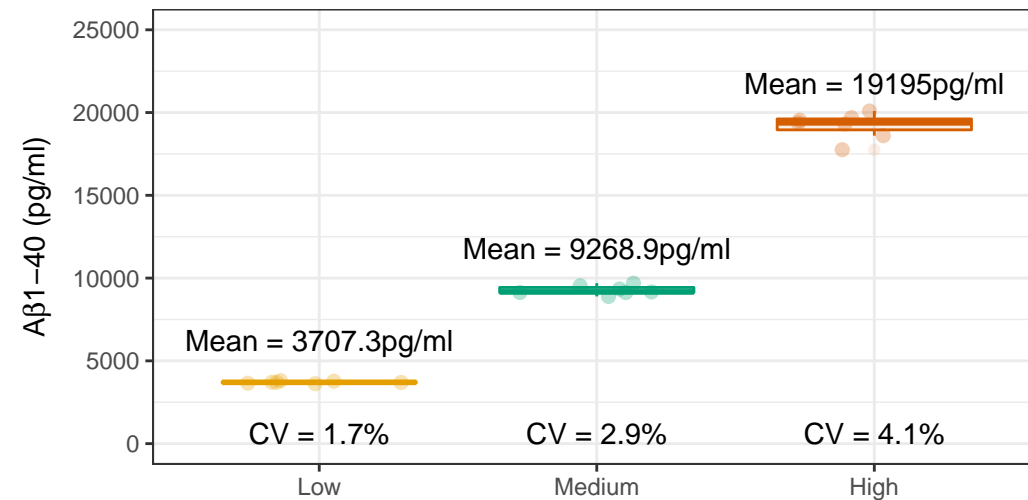**C**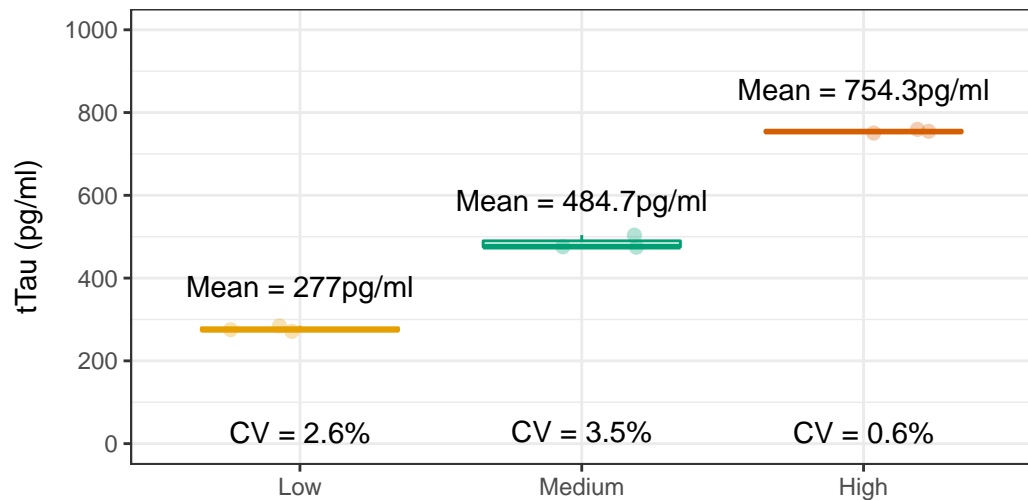**D**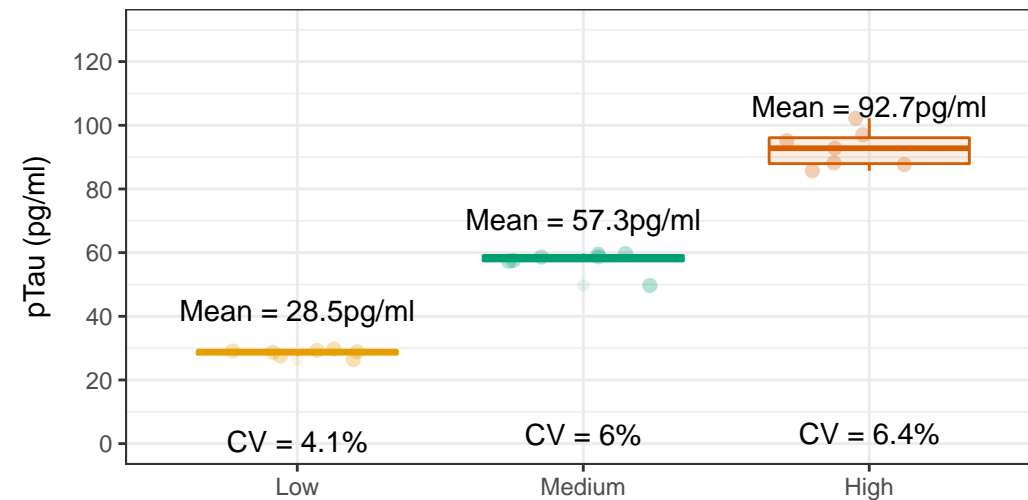

# A – Amyloid PET positivity

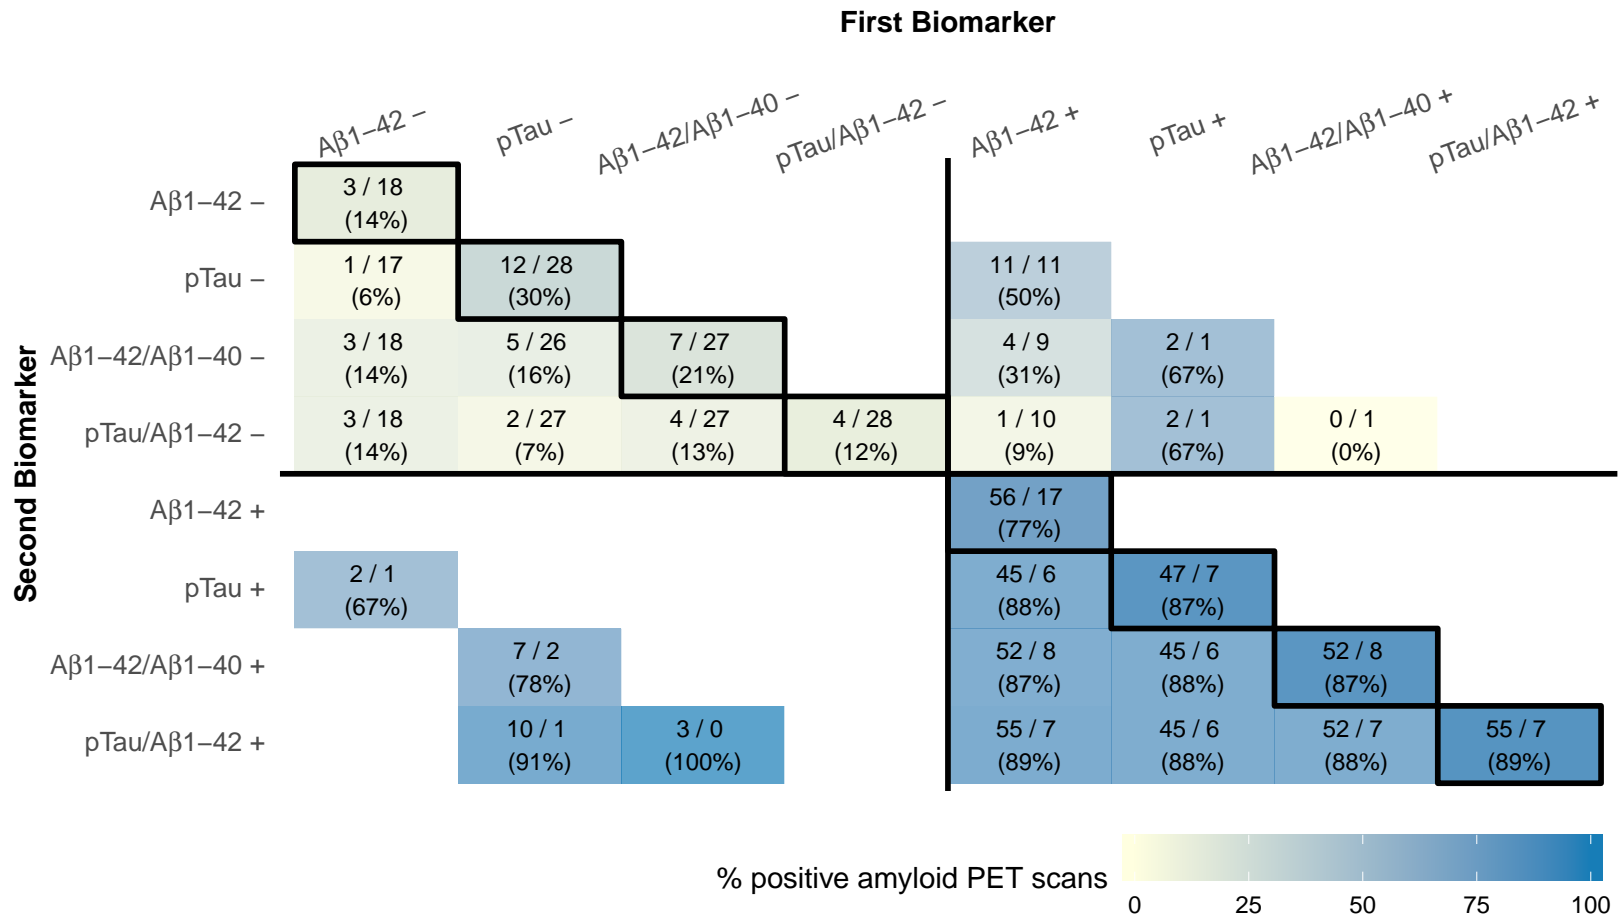

# B – Amyloid PET quantification

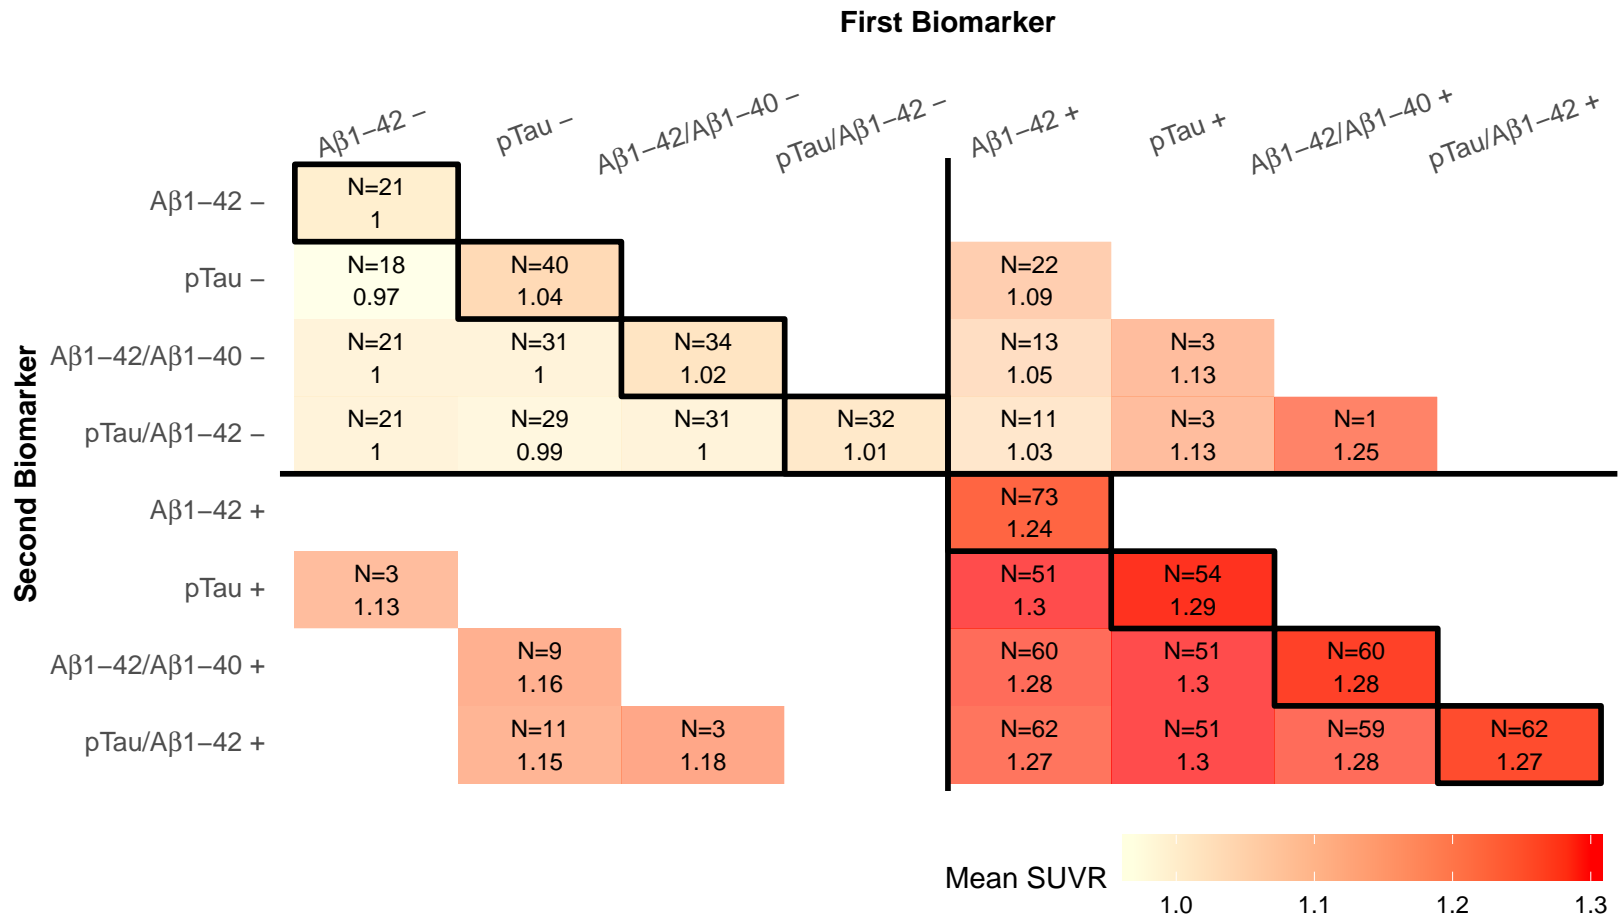

Supplement: ACN3-6-1815-s001.pdf [file ACN3-6-1815-s001.pdf]
